# Supplementary material for: Research on Forecast of Global COVID-19 Development Trend
Source: Research Square preprint supplement (doi:10.21203/rs.3.rs-948058/v1), 2021-10-12
Supplement: Supplementary file 1 [file 826f96891bcd9aa398bf5c13.xlsx]

## Sheet: Sheet1
	Supplementary Table 1 The cumulative daily number of confirmed cases worldwide from February 2, 2020 to August 14, 2021. It recorded the global cumulative confirmed cases from the initial outbreak of COVID-19 to the present, including 560 groups of data, and the five prediction models used in this paper were based on this data set.
	Date	Cumulative confirmed cases
	2020-02-02	149
	2020-02-03	154
	2020-02-04	177
	2020-02-05	191
	2020-02-06	205
	2020-02-07	212
	2020-02-08	235
	2020-02-09	243
	2020-02-10	255
	2020-02-11	262
	2020-02-12	270
	2020-02-13	287
	2020-02-14	298
	2020-02-15	317
	2020-02-16	332
	2020-02-17	347
	2020-02-18	363
	2020-02-19	396
	2020-02-20	463
	2020-02-21	596
	2020-02-22	893
	2020-02-23	1204
	2020-02-24	1593
	2020-02-25	1884
	2020-02-26	2375
	2020-02-27	3239
	2020-02-28	4196
	2020-02-29	5501
	2020-03-01	6441
	2020-03-02	8626
	2020-03-03	10861
	2020-03-04	12484
	2020-03-05	14344
	2020-03-06	17150
	2020-03-07	19894
	2020-03-08	23095
	2020-03-09	26257
	2020-03-10	30025
	2020-03-11	33623
	2020-03-12	39160
	2020-03-13	46732
	2020-03-14	53426
	2020-03-15	63104
	2020-03-16	71490
	2020-03-17	81759
	2020-03-18	95018
	2020-03-19	113772
	2020-03-20	129742
	2020-03-21	202226
	2020-03-22	233241
	2020-03-23	268478
	2020-03-24	309316
	2020-03-25	351396
	2020-03-26	402819
	2020-03-27	464095
	2020-03-28	535327
	2020-03-29	597922
	2020-03-30	656782
	2020-03-31	722179
	2020-04-01	798034
	2020-04-02	876785
	2020-04-03	951333
	2020-04-04	1033180
	2020-04-05	1118880
	2020-04-06	1179420
	2020-04-07	1128016
	2020-04-08	1331298
	2020-04-09	1413484
	2020-04-10	1499855
	2020-04-11	1595944
	2020-04-12	1674106
	2020-04-13	1746067
	2020-04-14	1814667
	2020-04-15	1887951
	2020-04-16	1969262
	2020-04-17	2059690
	2020-04-18	2146981
	2020-04-19	2227839
	2020-04-20	2300905
	2020-04-21	2375994
	2020-04-22	2462823
	2020-04-23	2531822
	2020-04-24	2618675
	2020-04-25	2716821
	2020-04-26	2802355
	2020-04-27	2871792
	2020-04-28	2942400
	2020-04-29	3019559
	2020-04-30	3099159
	2020-05-01	3204950
	2020-05-02	3301592
	2020-05-03	3380107
	2020-05-04	3458664
	2020-05-05	3545836
	2020-05-06	3627380
	2020-05-07	3719663
	2020-05-08	3815929
	2020-05-09	3910726
	2020-05-10	4005594
	2020-05-11	4083704
	2020-05-12	4159860
	2020-05-13	4245304
	2020-05-14	4336641
	2020-05-15	4435310
	2020-05-16	4530285
	2020-05-17	4622988
	2020-05-18	4704443
	2020-05-19	4841729
	2020-05-20	4936551
	2020-05-21	5037891
	2020-05-22	5139923
	2020-05-23	5258896
	2020-05-24	5353477
	2020-05-25	5459605
	2020-05-26	5541989
	2020-05-27	5636195
	2020-05-28	5740488
	2020-05-29	5867398
	2020-05-30	5979910
	2020-05-31	6117929
	2020-06-01	6217534
	2020-06-02	6319357
	2020-06-03	6399333
	2020-06-04	6563185
	2020-06-05	6694140
	2020-06-06	6858897
	2020-06-07	6977774
	2020-06-08	7075348
	2020-06-09	7187934
	2020-06-10	7293475
	2020-06-11	7449429
	2020-06-12	7588862
	2020-06-13	7728577
	2020-06-14	7861118
	2020-06-15	7987639
	2020-06-16	8112458
	2020-06-17	8246342
	2020-06-18	8422694
	2020-06-19	8560028
	2020-06-20	8740479
	2020-06-21	8871048
	2020-06-22	9030622
	2020-06-23	9179895
	2020-06-24	9340886
	2020-06-25	9521577
	2020-06-26	9703124
	2020-06-27	9896455
	2020-06-28	10078867
	2020-06-29	10239214
	2020-06-30	10394950
	2020-07-01	10575370
	2020-07-02	10796549
	2020-07-03	11007728
	2020-07-04	11187777
	2020-07-05	11376935
	2020-07-06	11557093
	2020-07-07	11731355
	2020-07-08	11945366
	2020-07-09	12159966
	2020-07-10	12388025
	2020-07-11	12613699
	2020-07-12	12835063
	2020-07-13	13029044
	2020-07-14	13227424
	2020-07-15	13456985
	2020-07-16	13684761
	2020-07-17	13937208
	2020-07-18	14187265
	2020-07-19	14418571
	2020-07-20	14641131
	2020-07-21	14848257
	2020-07-22	15087791
	2020-07-23	15374739
	2020-07-24	15655405
	2020-07-25	15887944
	2020-07-26	16091747
	2020-07-27	16411019
	2020-07-28	16641198
	2020-07-29	16901073
	2020-07-30	17118262
	2020-07-31	17453372
	2020-08-01	17746572
	2020-08-02	17944229
	2020-08-03	18237637
	2020-08-04	18451014
	2020-08-05	18710564
	2020-08-06	18981509
	2020-08-07	19265909
	2020-08-08	19545889
	2020-08-09	19811104
	2020-08-10	20040225
	2020-08-11	20265910
	2020-08-12	20535423
	2020-08-13	20813004
	2020-08-14	21101547
	2020-08-15	21390213
	2020-08-16	21635483
	2020-08-17	21858122
	2020-08-18	22057980
	2020-08-19	22319923
	2020-08-20	22594599
	2020-08-21	22848523
	2020-08-22	23137839
	2020-08-23	23391046
	2020-08-24	23601229
	2020-08-25	23844981
	2020-08-26	24097337
	2020-08-27	24376572
	2020-08-28	24665743
	2020-08-29	24950385
	2020-08-30	25211451
	2020-08-31	25423645
	2020-09-01	25686206
	2020-09-02	25957260
	2020-09-03	26222885
	2020-09-04	26513075
	2020-09-05	26841013
	2020-09-06	27104649
	2020-09-07	27335751
	2020-09-08	27537853
	2020-09-09	27779770
	2020-09-10	28083023
	2020-09-11	28392379
	2020-09-12	28719756
	2020-09-13	28992574
	2020-09-14	29234379
	2020-09-15	29495234
	2020-09-16	29795731
	2020-09-17	30097753
	2020-09-18	30419705
	2020-09-19	30767210
	2020-09-20	31031491
	2020-09-21	31306754
	2020-09-22	31548928
	2020-09-23	31856751
	2020-09-24	32132551
	2020-09-25	32498352
	2020-09-26	32841400
	2020-09-27	33118742
	2020-09-28	33374612
	2020-09-29	33633351
	2020-09-30	33929733
	2020-10-01	34252732
	2020-10-02	34582670
	2020-10-03	34916737
	2020-10-04	35208666
	2020-10-05	35491416
	2020-10-06	35816930
	2020-10-07	36168640
	2020-10-08	36499401
	2020-10-09	36856388
	2020-10-10	37209357
	2020-10-11	37540031
	2020-10-12	37864088
	2020-10-13	38155430
	2020-10-14	38480959
	2020-10-15	38878778
	2020-10-16	39322107
	2020-10-17	39727507
	2020-10-18	40066004
	2020-10-19	40442360
	2020-10-20	40801826
	2020-10-21	41211921
	2020-10-22	41665858
	2020-10-23	42148891
	2020-10-24	42664135
	2020-10-25	43104854
	2020-10-26	43513477
	2020-10-27	43964956
	2020-10-28	44430711
	2020-10-29	44971177
	2020-10-30	45553796
	2020-10-31	46096127
	2020-11-01	46573086
	2020-11-02	47009131
	2020-11-03	47462936
	2020-11-04	47967807
	2020-11-05	48622116
	2020-11-06	49270827
	2020-11-07	49897712
	2020-11-08	50378963
	2020-11-09	50899218
	2020-11-10	51304104
	2020-11-11	51790963
	2020-11-12	52672245
	2020-11-13	53302605
	2020-11-14	53894353
	2020-11-15	54462319
	2020-11-16	54912425
	2020-11-17	55528637
	2020-11-18	56175042
	2020-11-19	56804563
	2020-11-20	57487024
	2020-11-21	58146254
	2020-11-22	58684111
	2020-11-23	59191531
	2020-11-24	59772575
	2020-11-25	60350497
	2020-11-26	60965408
	2020-11-27	61568603
	2020-11-28	62218623
	2020-11-29	62775381
	2020-11-30	63276923
	2020-12-01	63810182
	2020-12-02	64458630
	2020-12-03	65108588
	2020-12-04	65828545
	2020-12-05	66508680
	2020-12-06	67129037
	2020-12-07	67644964
	2020-12-08	68214725
	2020-12-09	68856935
	2020-12-10	69545138
	2020-12-11	70224778
	2020-12-12	70886676
	2020-12-13	71502473
	2020-12-14	72895158
	2020-12-15	73466085
	2020-12-16	74109846
	2020-12-17	74849797
	2020-12-18	75586862
	2020-12-19	79279164
	2020-12-20	76888659
	2020-12-21	77409413
	2020-12-22	78001108
	2020-12-23	78650124
	2020-12-24	79335361
	2020-12-25	80011148
	2020-12-26	80447800
	2020-12-27	80949412
	2020-12-28	81372898
	2020-12-29	81960244
	2020-12-30	82624095
	2020-12-31	83382242
	2021-01-01	84087090
	2021-01-02	84613278
	2021-01-03	85266036
	2021-01-04	85745201
	2021-01-05	86411954
	2021-01-06	87141997
	2021-01-07	87948827
	2021-01-08	88779414
	2021-01-09	89639602
	2021-01-10	90358555
	2021-01-11	90925669
	2021-01-12	91601514
	2021-01-13	92317028
	2021-01-14	93060718
	2021-01-15	93839195
	2021-01-16	94581385
	2021-01-17	95211117
	2021-01-18	95743685
	2021-01-19	96284113
	2021-01-20	96912805
	2021-01-21	97603354
	2021-01-22	98384599
	2021-01-23	99009873
	2021-01-24	99572420
	2021-01-25	100020720
	2021-01-26	100543571
	2021-01-27	101116886
	2021-01-28	101715321
	2021-01-29	102286747
	2021-01-30	102895865
	2021-01-31	103376018
	2021-02-01	103759544
	2021-02-02	104182719
	2021-02-03	104648874
	2021-02-04	105182977
	2021-02-05	105679805
	2021-02-06	106147742
	2021-02-07	106539269
	2021-02-08	106917536
	2021-02-09	107219516
	2021-02-10	107658200
	2021-02-11	108103536
	2021-02-12	108551623
	2021-02-13	108945290
	2021-02-14	109288501
	2021-02-15	109614774
	2021-02-16	109924779
	2021-02-17	110289539
	2021-02-18	110694525
	2021-02-19	111106253
	2021-02-20	111478075
	2021-02-21	111844875
	2021-02-22	112202693
	2021-02-23	112529642
	2021-02-24	112911608
	2021-02-25	113367943
	2021-02-26	113827241
	2021-02-27	114219799
	2021-02-28	114582820
	2021-03-01	114927071
	2021-03-02	115255077
	2021-03-03	115679985
	2021-03-04	115909100
	2021-03-05	116520074
	2021-03-06	116578216
	2021-03-07	117083897
	2021-03-08	117632112
	2021-03-09	117910348
	2021-03-10	118061866
	2021-03-11	118775761
	2021-03-12	118987114
	2021-03-13	119514378
	2021-03-14	119920914
	2021-03-15	120586022
	2021-03-16	120707068
	2021-03-17	121067467
	2021-03-18	121595106
	2021-03-19	122159422
	2021-03-20	122771944
	2021-03-21	123221650
	2021-03-22	123710356
	2021-03-23	124551716
	2021-03-24	125080670
	2021-03-25	125707590
	2021-03-26	126406937
	2021-03-27	127032865
	2021-03-28	127601370
	2021-03-29	127988714
	2021-03-30	128367772
	2021-03-31	129035948
	2021-04-01	129823851
	2021-04-02	130543931
	2021-04-03	131154462
	2021-04-04	131664935
	2021-04-05	132195222
	2021-04-06	132725824
	2021-04-07	133359112
	2021-04-08	134065173
	2021-04-09	134891123
	2021-04-10	135485280
	2021-04-11	136274206
	2021-04-12	136956645
	2021-04-13	137619848
	2021-04-14	138378996
	2021-04-15	139200235
	2021-04-16	140046842
	2021-04-17	140876038
	2021-04-18	141647641
	2021-04-19	142334942
	2021-04-20	143047125
	2021-04-21	143927817
	2021-04-22	144828921
	2021-04-23	145667749
	2021-04-24	146584463
	2021-04-25	147402898
	2021-04-26	148117635
	2021-04-27	148831396
	2021-04-28	149686235
	2021-04-29	150587469
	2021-04-30	151502264
	2021-05-01	152354693
	2021-05-02	153146804
	2021-05-03	153818134
	2021-05-04	154514942
	2021-05-05	155314862
	2021-05-06	156188387
	2021-05-07	157052272
	2021-05-08	157859108
	2021-05-09	158038864
	2021-05-10	159286540
	2021-05-11	159930353
	2021-05-12	160644404
	2021-05-13	161417857
	2021-05-14	162154047
	2021-05-15	162862319
	2021-05-16	163469943
	2021-05-17	164025633
	2021-05-18	164587078
	2021-05-19	165214141
	2021-05-20	165880099
	2021-05-21	166505044
	2021-05-22	167099297
	2021-05-23	167640613
	2021-05-24	168128942
	2021-05-25	168286140
	2021-05-26	168808512
	2021-05-27	169384265
	2021-05-28	169937233
	2021-05-29	170436331
	2021-05-30	170919514
	2021-05-31	171302477
	2021-06-01	171740302
	2021-06-02	172209724
	2021-06-03	172710177
	2021-06-04	173184660
	2021-06-05	173597286
	2021-06-06	173995320
	2021-06-07	174316319
	2021-06-08	174647240
	2021-06-09	175021414
	2021-06-10	175432282
	2021-06-11	175890155
	2021-06-12	176307801
	2021-06-13	176687607
	2021-06-14	176988316
	2021-06-15	177297536
	2021-06-16	177675384
	2021-06-17	178093447
	2021-06-18	178481751
	2021-06-19	178880769
	2021-06-20	179238484
	2021-06-21	179527960
	2021-06-22	179835926
	2021-06-23	180214669
	2021-06-24	180660335
	2021-06-25	181061401
	2021-06-26	181474396
	2021-06-27	181849004
	2021-06-28	182155793
	2021-06-29	182493266
	2021-06-30	182883167
	2021-07-01	183284170
	2021-07-02	183734800
	2021-07-03	184151561
	2021-07-04	184547501
	2021-07-05	184879261
	2021-07-06	185246415
	2021-07-07	185722328
	2021-07-08	186184094
	2021-07-09	186691507
	2021-07-10	187173251
	2021-07-11	187583655
	2021-07-12	187933356
	2021-07-13	188420687
	2021-07-14	188959813
	2021-07-15	189549694
	2021-07-16	190122116
	2021-07-17	190647543
	2021-07-18	191155138
	2021-07-19	191576626
	2021-07-20	192082373
	2021-07-21	192632993
	2021-07-22	193209958
	2021-07-23	193801177
	2021-07-24	194167867
	2021-07-25	194787052
	2021-07-26	195207877
	2021-07-27	195800172
	2021-07-28	196414737
	2021-07-29	197108662
	2021-07-30	197775873
	2021-07-31	198424529
	2021-08-01	198985003
	2021-08-02	199396172
	2021-08-03	200045538
	2021-08-04	200735914
	2021-08-05	201438446
	2021-08-06	201816130
	2021-08-07	202397177
	2021-08-08	202914223
	2021-08-09	203877236
	2021-08-10	204579293
	2021-08-11	205265060
	2021-08-12	206007177
	2021-08-13	206503740
	2021-08-14	206686960
