# Supplementary material for: Research on Forecast of Global COVID-19 Development Trend
Source: Research Square preprint supplement (doi:10.21203/rs.3.rs-948058/v1), 2021-10-12
Supplement: Supplementary file 2 [file b9f8170fcc6e9b1b350a4cc8.docx]

**Research on forecast of global COVID-19 development trend**

Yunyun Cheng1, Yanping Bai2*, Ting Xu2, Rong Cheng2, Hongping Hu2

1 Department of Mathematics, School of Science, North University of China, Taiyuan 030051, China.

2 Department of Mathematics, School of Science, North University of China, Taiyuan 030051, China.

* Corresponding author

E-mail: [baiyp666@163.com](mailto:baiyp666@163.com)

Supplementary Materials

**Supplementary Figure 1**


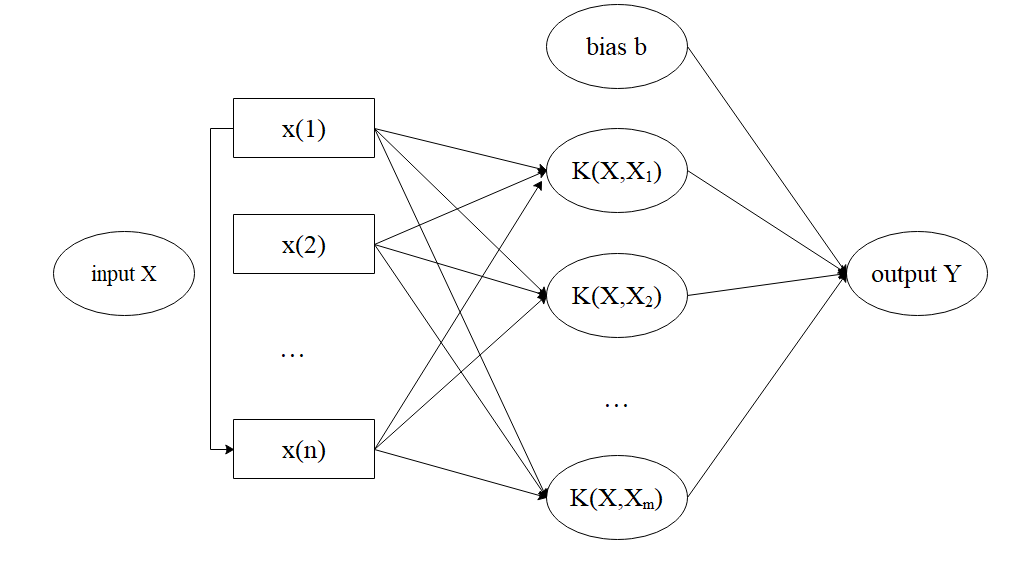


Supplementary Figure 1. SVM network structure diagram. K is the kernel function, which is the key of the SVM algorithm. It represents the inner product kernel between the support vector and the vector extracted from the input space.

**Supplementary Figure 2**


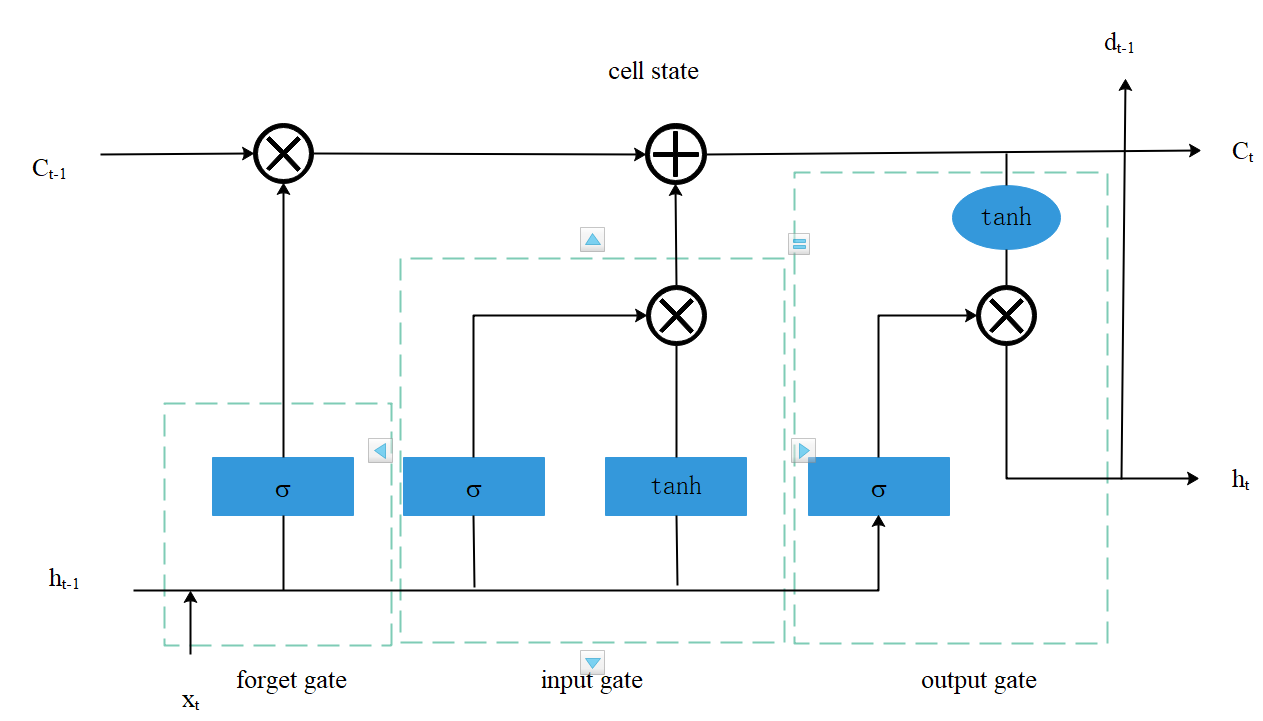


Supplementary Figure 2. LSTM network structure diagram. It is a simple loop in the structure of LSTM network, and has four interrelated fully connected feedforward neural networks, including forget gate, input gate, output gate and cell state. The gate consists of a sigmoid activation function network layer and a dot product operation. Three gates are used to control cell state information in LSTM.
